# Supplementary material for: Design and catalytic performance of a novel 2D copper MOF for green synthesis of tetrahydrobenzo[b]pyrans
Source: Research Square preprint supplement (doi:10.21203/rs.3.rs-6330783/v1), 2025-04-09
Supplement: Supplementary file 1 [file 9b894c01b14b292cffda539f.docx]

**Supporting Information**

**Design and catalytic performance of a novel 2D copper MOF for green synthesis of tetrahydrobenzo[b]pyrans**

Ehsan Joukar Bahaderania, Khosro Mohammadi*a, Payam Hayati*b, Jan Janczakc

*a Chemistry Department, Faculty of Nano and Bio Sciences and Technology, Persian Gulf University, Bushehr 75169, Iran*

*b Department of Biotechnology and Life Sciences, University of Insubria, Via Jean Henry Dunant, 3, 21100 Varese, Italy*

*c Institute of Low Temperature and Structure Research, Polish Academy of Sciences, P. O. Box 1410, Okólna 2 Str., 50-422 Wroclaw, Poland*

Email: [khmohammadi@pgu.ac.ir](mailto:khmohammadi@pgu.ac.ir); [khmohammadi@yahoo.com](mailto:khmohammadi@yahoo.com)

**Table S1**. Crystallographic data for (**1**).

| **Compound** | **[Cu(H2O)(*m*-PO3CH2C6H4CO2H)]n (1)** |
| --- | --- |
| Chemical formula | C8H9CuO6P |
| *M*r | 295.66 |
| Crystal system, space group | Monoclinic, *P*21/*n* |
| Temperature (K) | 295(2) |
| *a*, *b*, *c* (Å) | 5.7362 (5), 4.7509 (4), 34.635 (3) |
| *β* (°) | 92.327 (7) |
| *V* (Å3) | 943.09 (14) |
| *Z* | 4 |
| *D*calc (g·cm–3) | 2.082 |
| Radiation type, wavelength, λ (Å) | Mo *Kα* , 0.71073 |
| *µ* (mm−1) | 2.50 |
| *F*(000) | 596 |
| Crystal size (mm) | 0.24 × 0.20 × 0.15 |
| *T*min, *T*max | 0.794, 1.000 |
| *θ* range(°) | 3.5-27.4 |
| Absorption correction | multi-scan |
| Reflections collected / unique / observed | 26181, 2167, 1913 |
| *R*int | 0.064 |
| Refinement on | *F*2 |
| *R*[*F*2 > 2σ(*F*2)] | 0.0745 |
| *wR*(*F*2 all reflections) | 0.1655 |
| Goodness-of-fit, *S* | 1.001 |
| Δ*ρ*max, Δ*ρ*min (e Å−3) | +1.442, -0.844 |

*wR*={Σ [*w*(*F*o2–*F*c2)2]/Σ*wF*o4}½; *w* = 1/[*σ*2(*F*o2) + (0.0549*P*)2 + 16.5039*P*] where *P* = (*F*o2 + 2*F*c2)/3

**Figure S1**


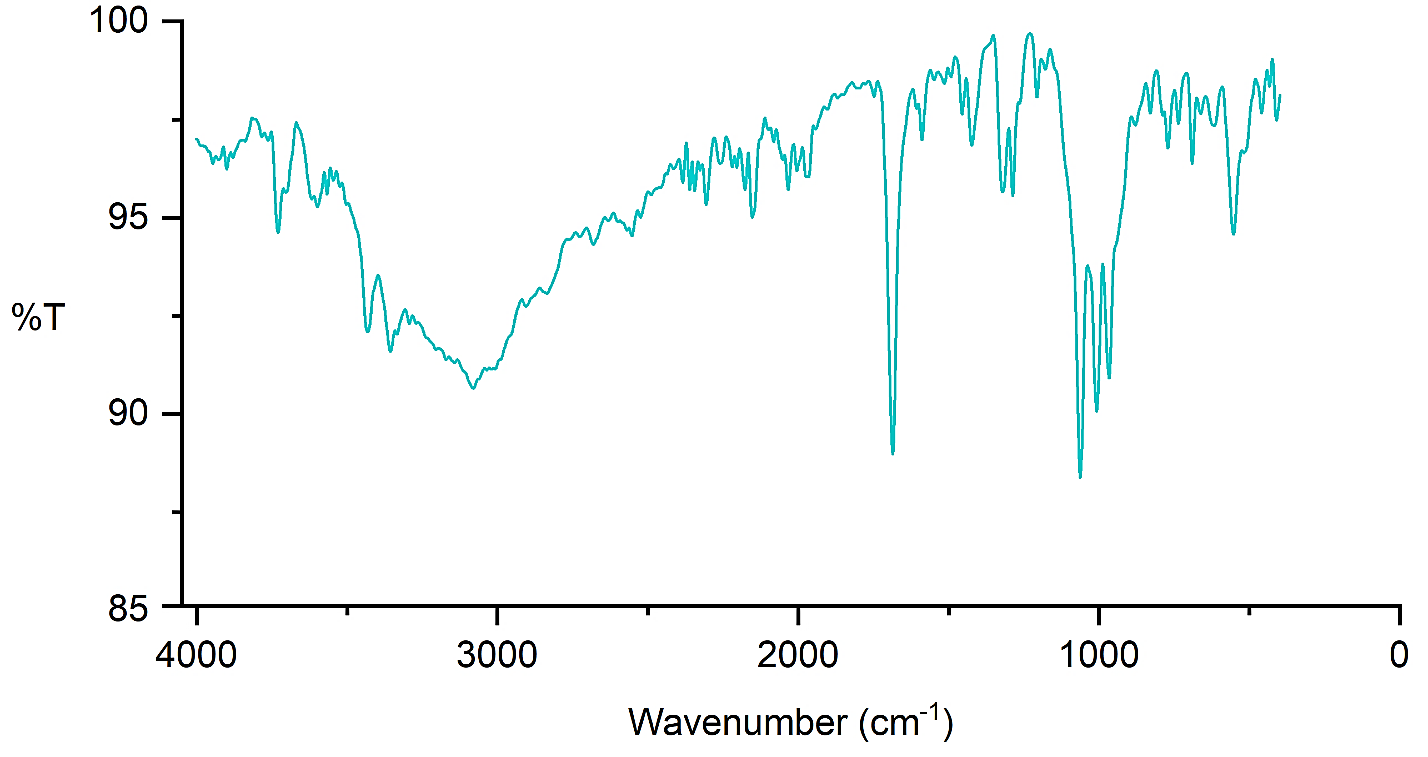


**Figure S1.** IR spectrum of nanoparticle (**1′**).

**Figure S2**

**Figure S2.** TGA/DTA of nanoparticle (**1′**).
